# Supplementary material
Source: PubMed Central journal article supplement (PMC4757902)
Supplement: NIHMS757874-supplement-Supp_Table_1.pdf [file NIHMS757874-supplement-Supp_Table_1.pdf]

**Supplemental Table 1.** Donors' demographic information.

| Donor | Race      | Sex    | Age | BMI  |
|-------|-----------|--------|-----|------|
| 1     | Caucasian | Female | 39  | 23.4 |
| 2     | Caucasian | Female | 25  | 22   |
| 3     | Caucasian | Female | 40  | 21.8 |
