# Supplementary material
Source: PubMed Central journal article supplement (PMC4757902)
Supplement: NIHMS757874-supplement-Supp_Table_2.pdf [file NIHMS757874-supplement-Supp_Table_2.pdf]

**Supplemental Table 2.** PCR primer set sequences.

| Gene Name      | Forward Primer (5'-3') | Reverse Primer (5'-3') |
|----------------|------------------------|------------------------|
| DLK            | GCTTCATCGACAAGACCT     | GGTGAGACCTGTGAACTC     |
| C/EBP $\alpha$ | GAGGAGGATGAAGCCAAG     | GATCTGGAAGCTGCAGGTG    |
| IGF1           | CTGTGATCTAAGGAGGCTG    | TTCGTGTTCTTGTGGTAGA    |
| PPAR- $\gamma$ | GCTGTTATGGGTGAAACTCTG  | ATAAGGTGGAGATGCAGGTTC  |
| LPL            | GAGATTTCTCTGTATGGCACC  | CTGCAAATGAGACACTTTCTC  |
| AP2            | CTCTAGAATGAGAATTGCACTG | TAGTTTAAGGACCGGGTCAT   |
| SERBP-1C       | CTCTTGAAGCCTTCCTGAG    | GCACTGACTCTTCCTTGAT    |
| C/EBP- $\beta$ | CCAACTTCTACTACGAGGC    | GGCTGAAGTCGATGGC       |
| ER $\alpha$    | GGCATGGTGGAGATCTTCGA   | CCTCTCCCTGCAGATTCATCA  |
| ER $\beta$     | CGTGACCGATGCTTTGGTTT   | CGTGACCGATGCTTTGGTTT   |
| $\beta$ -actin | CACCTTCTACAATGAGCTGC   | TCTTCTCGATGCTCGACGGA   |
