# Supplementary material
Source: PubMed Central journal article supplement (PMC4757902)

## AP2

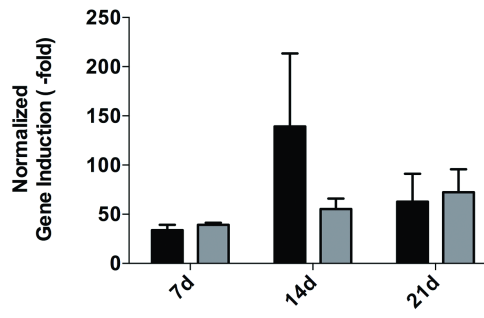

## CEBPB

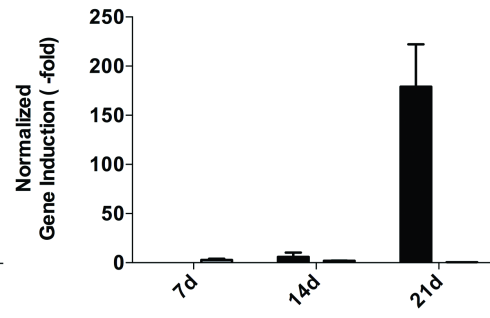

## SREBP-1c

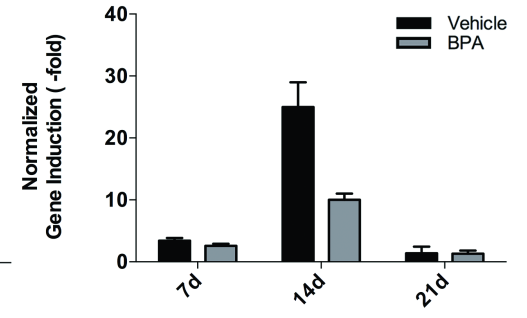

Supplement: NIHMS757874-supplement-Supp_Fig_1.pdf [file NIHMS757874-supplement-Supp_Fig_1.pdf]
